# Supplementary material
Source: PubMed Central journal article supplement (PMC4047732)
Supplement: SD4.pdf [file SD4.pdf]

SUPPLEMENTAL TABLE 1

Comparison of polymerase chain reaction results obtained from DNA extracted from filter papers or rapid diagnosis tests

| PCR-RDT  | PCR-FP   |          | Total |
|----------|----------|----------|-------|
|          | Positive | Negative |       |
| Positive | 40       | 27       | 67    |
| Negative | 6        | 74       | 80    |
| Total    | 46       | 101      | 147   |

Number of observed agreements: 114 (77.55% of the observations). Number of agreements expected by chance: 75.9 (51.65% of the observations;  $\kappa = 0.536$ , SE of  $\kappa = 0.068$ , 95% confidence interval: from 0.403 to 0.669). The strength of agreement is considered to be moderate. FP = filter paper; PCR = polymerase chain reaction; RDT = rapid diagnosis test.
